# Supplementary material for: Air–liquid interface cultures trigger a metabolic shift in intestinal epithelial cells (IPEC-1)
Source: PubMed Central journal article supplement (PMC10191962; doi:10.1007/s00418-023-02180-x), 2023-02-15
Supplement: 418_2023_2180_MOESM1_ESM.pdf [file 418_2023_2180_MOESM1_ESM.pdf]

## **Air-liquid interface cultures trigger a metabolic shift in intestinal epithelial cells (IPEC-1)**

Martin Stollmeier<sup>1</sup>, Stefan Kahlert<sup>1</sup>, Werner Zuschratter<sup>2</sup>, Michael Oster<sup>3</sup>, Klaus Wimmers<sup>3</sup>, Berend Isermann<sup>4</sup>, Hermann-Josef Rothkötter<sup>1</sup>, Constanze Nossol<sup>1</sup>

corresponding author:

Dr. rer. nat. Constanze Nossol

Institute of Anatomy Medical Faculty

Otto-von-Guericke University

39120 Magdeburg

Germany

**Fig. S1 Analyses of different genes via western blot.** This figure is related to **Fig. 2**. Different genes COX5B [14 kDa] (**a**), MCT1 [54 kDa] (**b**), MITO [60 kDa] (**c**) and GAPDH [37 kDa] (**d**) were analysed via western blot analysis. 3 independent experiments (passage 116, 117, 118) were carried out. **aa, bb, cc, dd** In addition,  $\beta$ -actin was used as loading control (42 kDa).
