# Supplementary material for: Air–liquid interface cultures trigger a metabolic shift in intestinal epithelial cells (IPEC-1)
Source: PubMed Central journal article supplement (PMC10191962; doi:10.1007/s00418-023-02180-x), 2023-02-15

## **Air-liquid interface cultures trigger a metabolic shift in intestinal epithelial cells (IPEC-1)**

Martin Stollmeier<sup>1</sup>, Stefan Kahlert<sup>1</sup>, Werner Zuschratter<sup>2</sup>, Michael Oster<sup>3</sup>, Klaus Wimmers<sup>3</sup>, Berend Isermann<sup>4</sup>, Hermann-Josef Rothkötter<sup>1</sup>, Constanze Nossol<sup>1</sup>

corresponding author:

Dr. rer. nat. Constanze Nossol

Institute of Anatomy Medical Faculty

Otto-von-Guericke University

39120 Magdeburg

Germany

**Fig. S2** Proteins were separated in cytoplasmatic and nuclear fraction with the NE-PER Nuclear and Cytoplasmic Extraction Reagents. This figure is related to **Fig. 3**. We demonstrate the original western blots of all 4 experiments (passage 113, 114, 115 and 119). **a, b, c** A higher content of HIF-1 $\alpha$  (predicted size: 93 kDa) was detected in the nuclear cytoplasmatic fraction of SMC compared to ALI. Hela cells were used as control cells and were treated with 100  $\mu$ M CoCl<sub>2</sub> for 4 hours to induce hypoxia. The cell lysate was used as control for HIF-1 $\alpha$  expression but was purchased from Nobus Biologicals (USA). **aa, bb, cc**  $\beta$ -actin was used as loading control (42 kDa). In b and bb a loading of the nuclear fraction (\*; p114) was not possible, because protein content of the sample was too low.

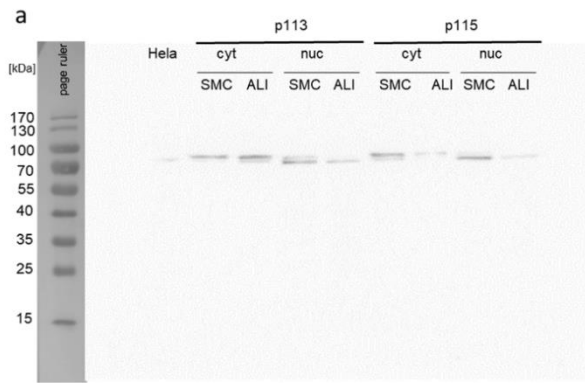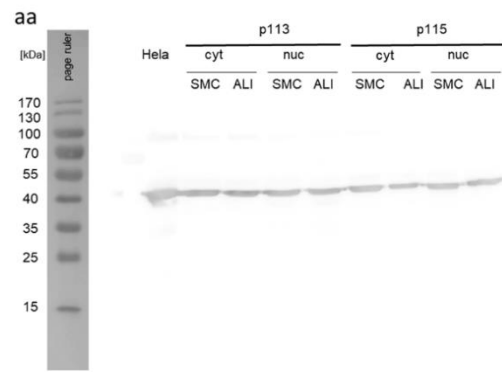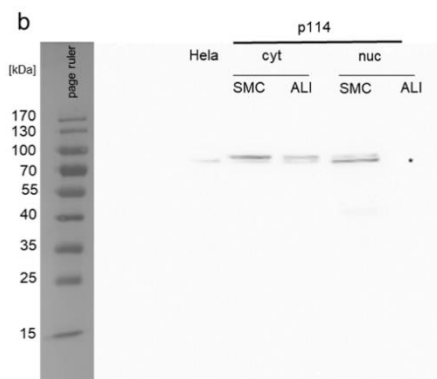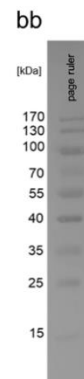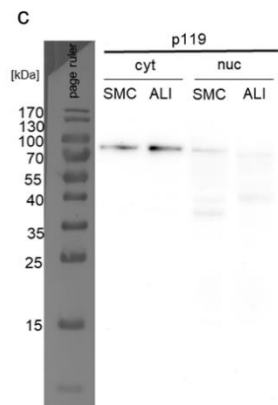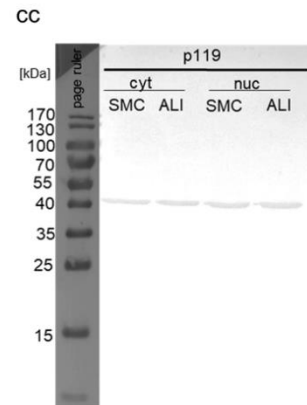

Supplement: 418_2023_2180_MOESM2_ESM.pdf [file 418_2023_2180_MOESM2_ESM.pdf]
