# Supplementary material for: Air–liquid interface cultures trigger a metabolic shift in intestinal epithelial cells (IPEC-1)
Source: PubMed Central journal article supplement (PMC10191962; doi:10.1007/s00418-023-02180-x), 2023-02-15

## Air-liquid interface cultures trigger a metabolic shift in intestinal epithelial cells (IPEC-1)

Martin Stollmeier<sup>1</sup>, Stefan Kahlert<sup>1</sup>, Werner Zuschratter<sup>2</sup>, Michael Oster<sup>3</sup>, Klaus Wimmers<sup>3</sup>, Berend Isermann<sup>4</sup>, Hermann-Josef Rothkötter<sup>1</sup>, Constanze Nossol<sup>1</sup>

corresponding author:

Dr. rer. nat. Constanze Nossol

Institute of Anatomy Medical Faculty

Otto-von-Guericke University

39120 Magdeburg

Germany

**Fig. S3 Analysis of vimentin via western blot analyses.** This figure is related to **Fig. 4. a** Three different passages were used to evaluate the content of vimentin in SMC and ALI (passages 115, 116 and 117). We found a higher content of vimentin (54 kDa) in SMC compared to ALI. **aa**  $\beta$ -actin was used as loading control (42 kDa).

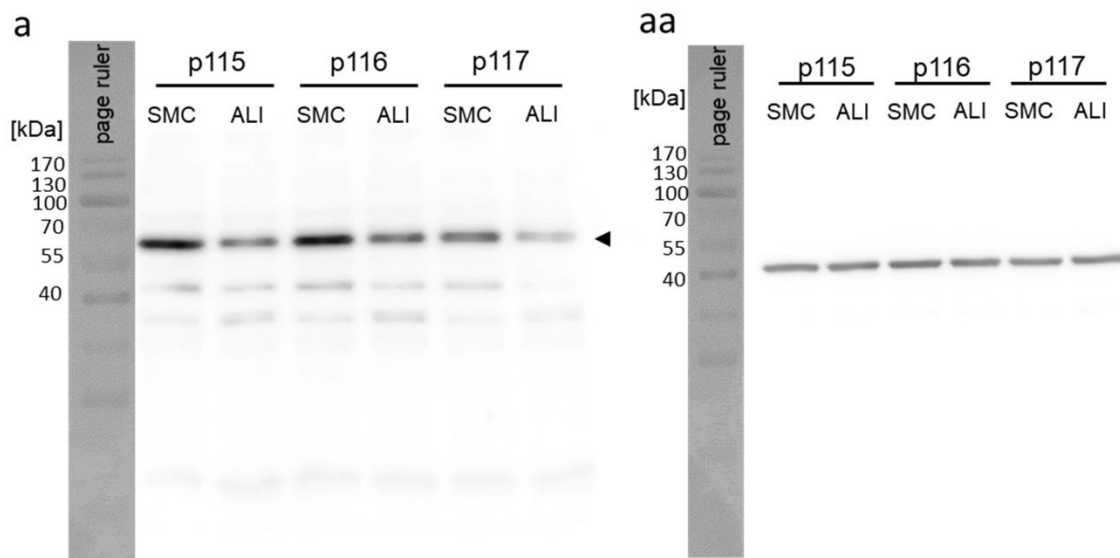

Supplement: 418_2023_2180_MOESM3_ESM.pdf [file 418_2023_2180_MOESM3_ESM.pdf]
